# Supplementary material for: Infusion of blood from mice displaying cerebral amyloidosis accelerates amyloid pathology in animal models of Alzheimer’s disease
Source: PubMed Central journal article supplement (PMC7720397; doi:10.1186/s40478-020-01087-1), 2020-12-07

**Supplemental Table 1: Sex distribution of mice**

| <b>Experiment</b>   | <b>Group</b>                               | <b>Male</b> | <b>Female</b> |
|---------------------|--------------------------------------------|-------------|---------------|
| <b>Experiment 1</b> | Tg untreated                               | 2           | 11            |
|                     | Tg+ WT blood (2 transfusions)              | 1           | 4             |
|                     | Tg + Tg blood (1 transfusion)              | 6           | 0             |
|                     | Tg + Tg blood (2 transfusion)              | 1           | 4             |
|                     | WT + Tg blood (2 transfusions)             | 6           | 0             |
| <b>Experiment 2</b> | Tg2576 + WT blood cells                    | 0           | 5             |
|                     | Tg2576 + WT Plasma                         | 4           | 2             |
|                     | Tg2576 + Tg blood cells                    | 2           | 2             |
|                     | Tg2576 + Tg Plasma                         | 3           | 2             |
| <b>Experiment 3</b> | PBS                                        | 4           | 1             |
|                     | RecHuAb (6 m)                              | 2           | 4             |
|                     | RecHuAb (2.5 m)                            | 3           | 2             |
| <b>Experiment 4</b> | APP/PSEN (WT blood)                        | 1           | 3             |
|                     | APP/PSEN (Tg blood)                        | 1           | 4             |
| <b>Experiment 5</b> | Tg+ WT blood (2 transfusions)              | 2           | 2             |
|                     | Tg + Tg blood (2 transfusion)              | 2           | 6             |
| <b>Experiment 6</b> | Tg+ WT blood (2 transfusions)              | 3           | 2             |
|                     | Tg + Tg blood (2 transfusion)              | 3           | 4             |
| <b>Experiment 7</b> | Tg+ WT blood (2 transfusions)              | 1           | 4             |
|                     | Tg + Tg blood (2 transfusion)              | 4           | 2             |
| <b>Experiment 8</b> | Tg+ WT blood (2 transfusions) <sup>a</sup> | 1           | 4             |
|                     | Tg + 10% Tg brain homogenate               | 1           | 1             |

<sup>a</sup> This group is the same as the one presented in Experiment 1

# Supplemental Figure 1

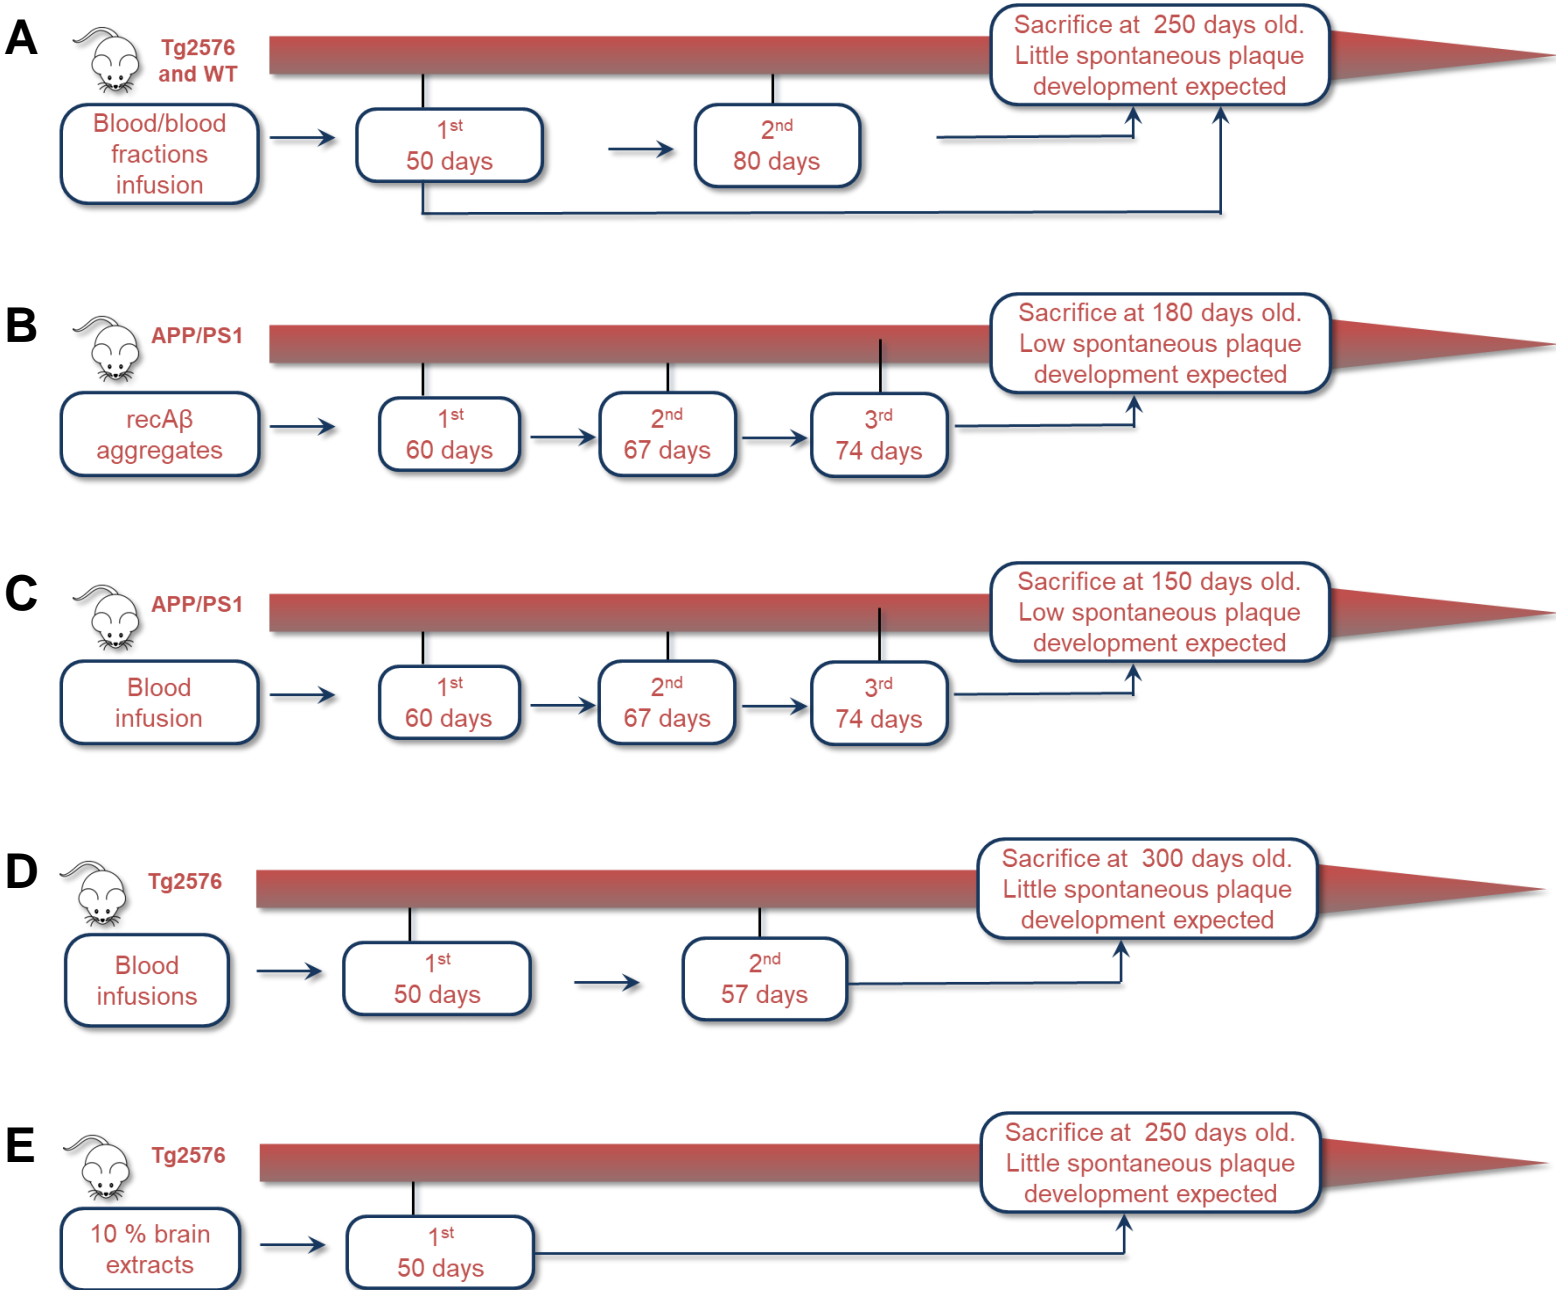

Supplemental Figure 2

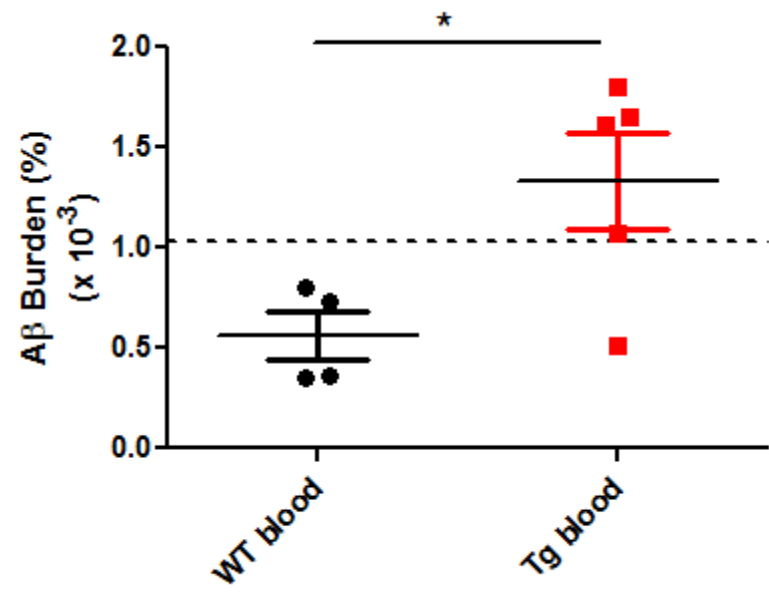

Supplemental Figure 3

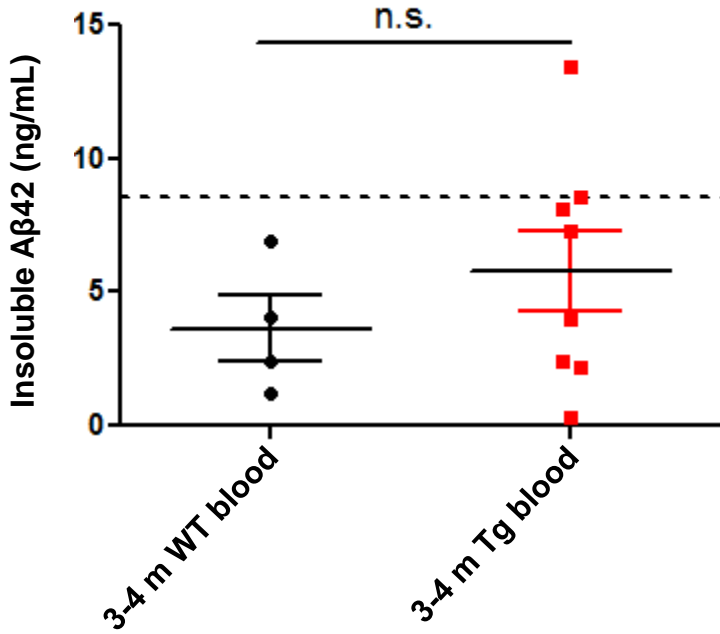

Supplemental Figure 4

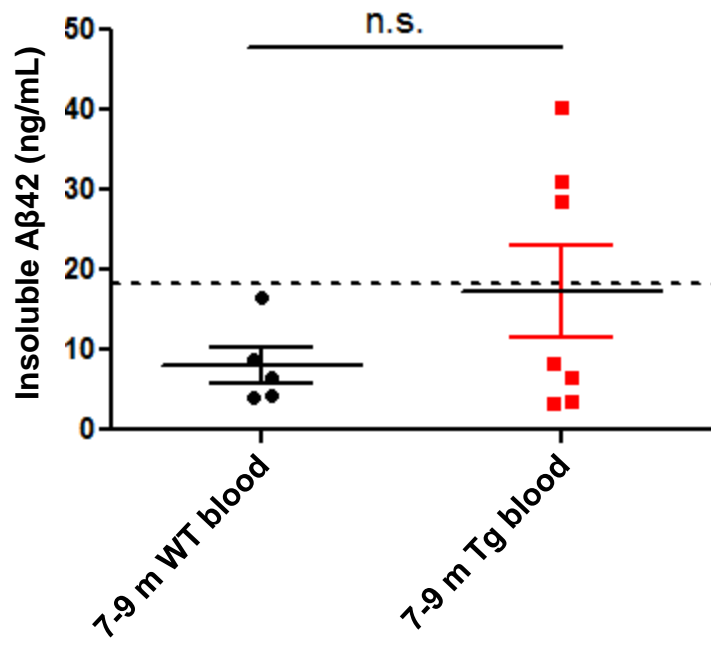

Supplemental Figure 5

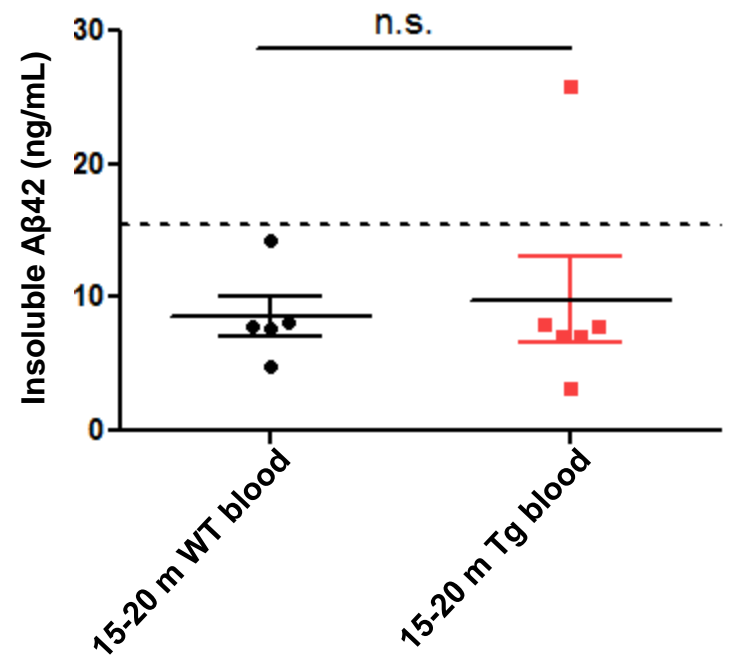

Supplemental Figure 6

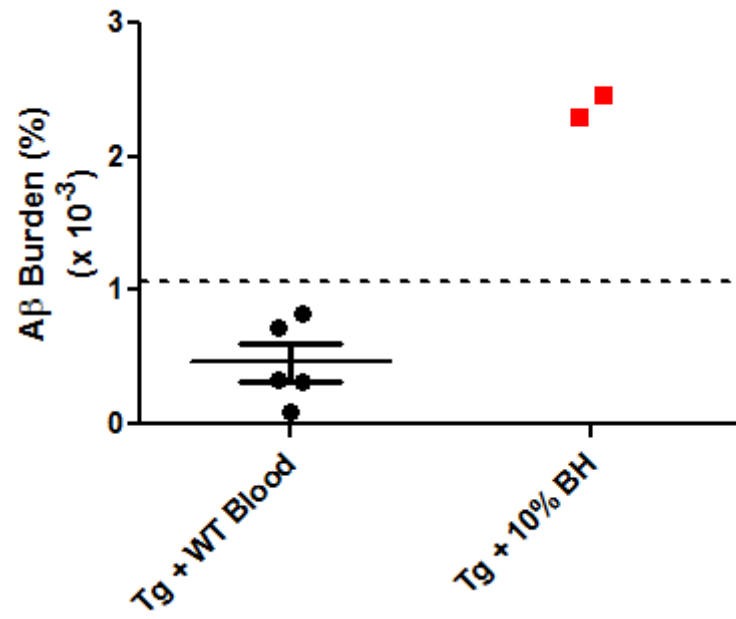

Supplement: 40478_2020_1087_MOESM1_ESM.pdf [file 40478_2020_1087_MOESM1_ESM.pdf]
